# Supplementary material for: Articulation-Function-Associated Cortical Developmental Changes in Patients with Cleft Lip and Palate
Source: Brain Sci. 2023 Mar 25;13(4):550. doi: 10.3390/brainsci13040550 (PMC10136718; doi:10.3390/brainsci13040550)
Supplement: Supplementary file 1 [file brainsci-13-00550-s001.zip › brainsci-2263778-supplementary.pdf]

# The inclusion and exclusion criteria of the participants

**Table S1** The inclusion and exclusion criteria of the CLP participants

| <b>The inclusion criteria of CLP participants</b>                                                                                                                                     |                                |                               |
|---------------------------------------------------------------------------------------------------------------------------------------------------------------------------------------|--------------------------------|-------------------------------|
| All patients with cleft lip and palate, and have good recovery of palatopharyngeal function after palatoplasty surgery more than 1 year.                                              | <input type="checkbox"/> 1 Yes | <input type="checkbox"/> 0 No |
| The age of CLP adolescents is between 5 and 16 years, and the age of CLP adults is between 18 and 40 years                                                                            | <input type="checkbox"/> 1 Yes | <input type="checkbox"/> 0 No |
| The native language is Chinese                                                                                                                                                        | <input type="checkbox"/> 1 Yes | <input type="checkbox"/> 0 No |
| Normal intelligence quotient (IQ)≥90,Wechsler Intelligence Scale                                                                                                                      | <input type="checkbox"/> 1 Yes | <input type="checkbox"/> 0 No |
| Right-handed                                                                                                                                                                          | <input type="checkbox"/> 1 Yes | <input type="checkbox"/> 0 No |
| Free of neurological disease ,psychiatric disorders and contraindications of fMRI                                                                                                     | <input type="checkbox"/> 1 Yes | <input type="checkbox"/> 0 No |
| CLP subjects had two or more typical characteristics of articulation disorder, such as hypernasality, nasal emission, weak or absent of consonants and compensatory misarticulations. | <input type="checkbox"/> 1 Yes | <input type="checkbox"/> 0 No |
| CLP subjects with articulation disorder had score ≤70 points in articulation test.(Chinese language clear degree list)                                                                | <input type="checkbox"/> 1 Yes | <input type="checkbox"/> 0 No |
| All subjects had not received speech training.                                                                                                                                        | <input type="checkbox"/> 1 Yes | <input type="checkbox"/> 0 No |
| <b>The exclusion criteria of CLP participants</b>                                                                                                                                     |                                |                               |
| neurological or psychiatric disorders and contraindications of fMRI                                                                                                                   | <input type="checkbox"/> 1 Yes | <input type="checkbox"/> 0 No |
| Systematic medication and psychotherapy within 1 year prior to enrollment                                                                                                             | <input type="checkbox"/> 1 Yes | <input type="checkbox"/> 0 No |
| Inability to cooperate with the relevant assessment and examination                                                                                                                   | <input type="checkbox"/> 1 Yes | <input type="checkbox"/> 0 No |
| Refused to participate in fMRI experiment                                                                                                                                             | <input type="checkbox"/> 1 Yes | <input type="checkbox"/> 0 No |

**Table S2** The inclusion and exclusion criteria of the healthy participants

| <b>The inclusion criteria of healthy participants</b>                                                                         |                                |                               |
|-------------------------------------------------------------------------------------------------------------------------------|--------------------------------|-------------------------------|
| The age of healthy children and adolescents between 5 and 16 years, and the age of healthy adults is between 18 and 40 years. | <input type="checkbox"/> 1 Yes | <input type="checkbox"/> 0 No |
| The native language is Chinese                                                                                                | <input type="checkbox"/> 1 Yes | <input type="checkbox"/> 0 No |
| Normal intelligence quotient: Normal intelligence by clinical screening                                                       | <input type="checkbox"/> 1 Yes | <input type="checkbox"/> 0 No |
| Right-handed                                                                                                                  | <input type="checkbox"/> 1 Yes | <input type="checkbox"/> 0 No |
| Free of neurological disease , psychiatric disorders and contraindications of fMRI                                            | <input type="checkbox"/> 1 Yes | <input type="checkbox"/> 0 No |
| clinically screened for normal articulation function by a speech therapist                                                    | <input type="checkbox"/> 1 Yes | <input type="checkbox"/> 0 No |
| <b>The exclusion criteria of Healthy participants</b>                                                                         |                                |                               |
| neurological or psychiatric disorders and contraindications of fMRI                                                           | <input type="checkbox"/> 1 Yes | <input type="checkbox"/> 0 No |
| Systematic medication and psychotherapy within 1 year prior to enrollment                                                     | <input type="checkbox"/> 1 Yes | <input type="checkbox"/> 0 No |
| Inability to cooperate with the relevant assessment and examination                                                           | <input type="checkbox"/> 1 Yes | <input type="checkbox"/> 0 No |
| Refused to participate in fMRI experiment                                                                                     | <input type="checkbox"/> 1 Yes | <input type="checkbox"/> 0 No |
